# Supplementary material for: Role of circadian gene Clock during differentiation of mouse pluripotent stem cells
Source: PubMed Central journal article supplement (PMC5084156; doi:10.1007/s13238-016-0319-9), 2016-09-23
Supplement: 13238_2016_319_MOESM1_ESM.pdf [file 13238_2016_319_MOESM1_ESM.pdf]

**Supplemental Figure 1**

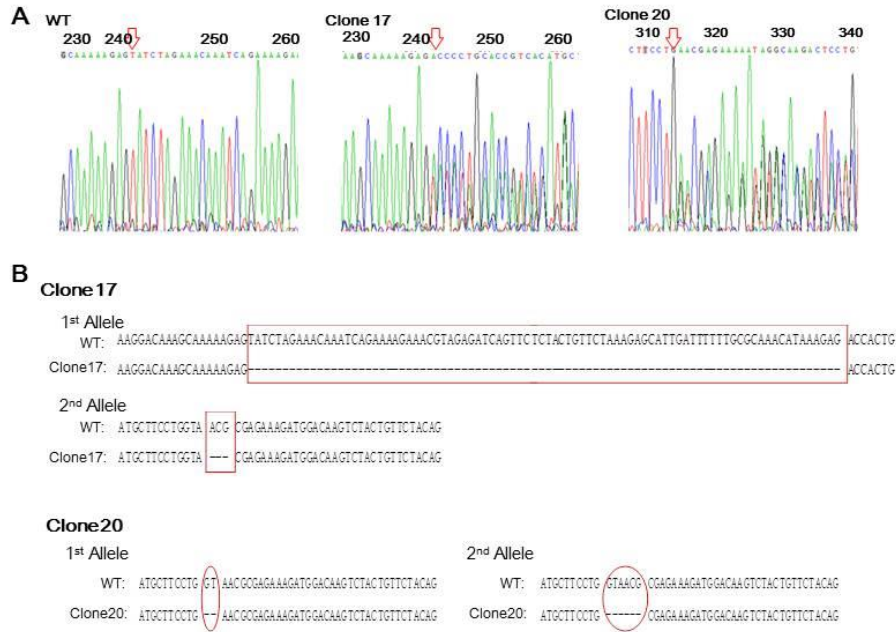

**Supplemental Figure 1**

(A) The positive homozygous mESC clone 17 and clone 20 showed modified gene sequence on exon 2 in both alleles of the Clock gene. (B) Sequencing results of the TA cloning of PCR products flanking the CRISPR/CAS9 cutting site for clone 17 and clone 20.

## Supplemental Figure 2

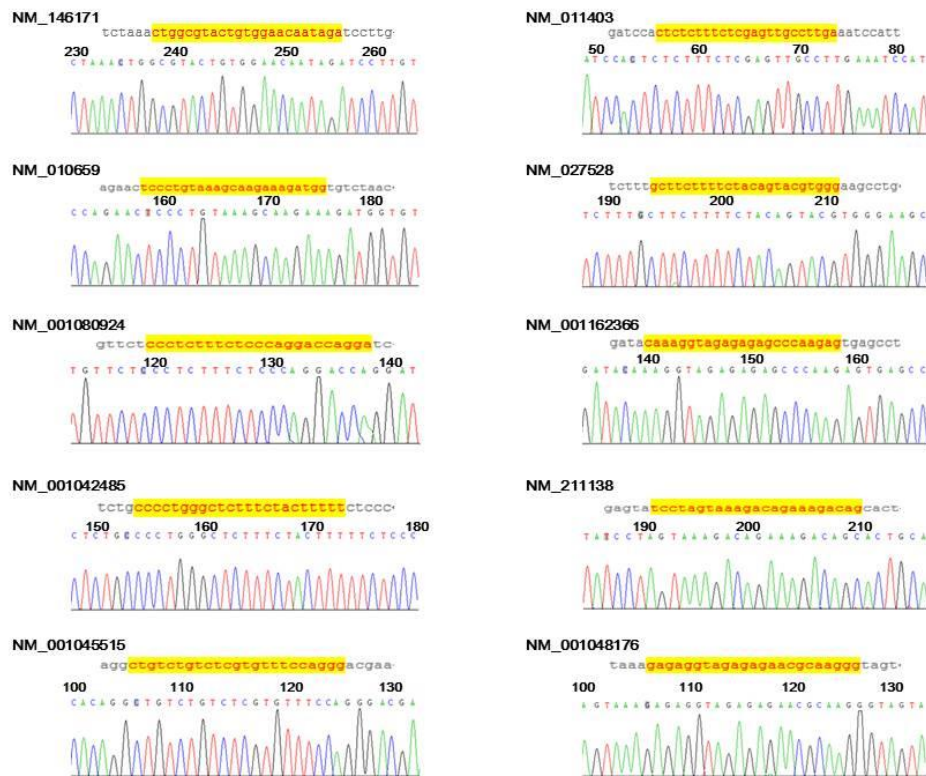

## Supplemental Figure 2

The yellow shaded parts were the most probable ten off-target modification sites. The corresponding genes were NM\_146171, NM\_011403, NM\_010659, NM\_027528, NM\_001080924, NM\_001162366, NM\_001042485, NM\_211138, NM\_001045515 and NM\_001048176. Specific PCR primers were designed according to the target gene sequences of mouse (Supplemental Table. 3). The Sanger's sequencing indicated that there was no off-target gene modification at these most probable ten off-target modification sites.

### Supplemental Figure 3

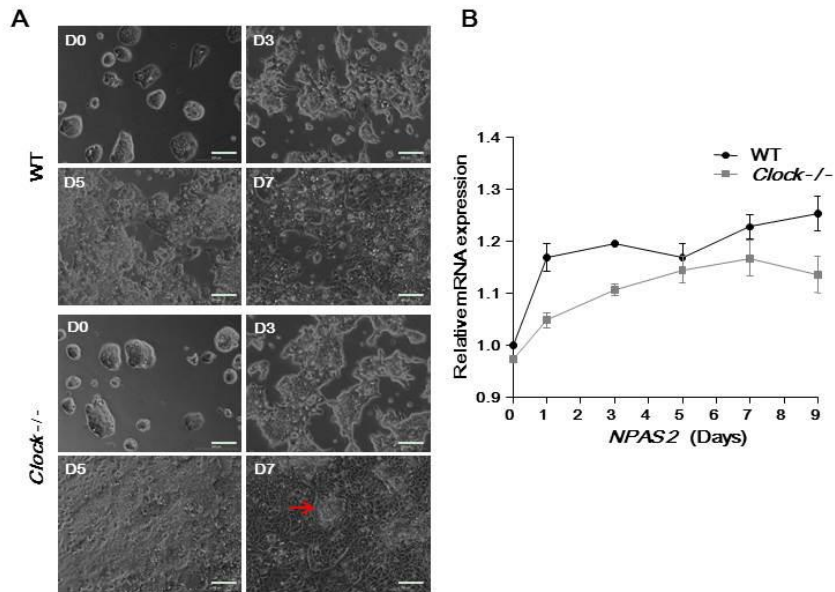

### Supplemental Figure 3

(A) Phase images of wild type and *Clock*<sup>-/-</sup> mESCs on days 0, 3, 5, and 7 after spontaneous differentiation. The red arrows indicate complex cellular structures found in *Clock*<sup>-/-</sup> mESCs on day 7 after spontaneous differentiation. Bars, 200  $\mu$ m. (B) Relative mRNA expression level of NPAS2 after spontaneous differentiation in wild type and *Clock*<sup>-/-</sup> mESCs. The mRNA expression levels were normalized with that of the endogenous GAPDH. Data represent the average of three independent experiments and are presented as means  $\pm$  S.D.
