# Supplementary material for: Role of circadian gene Clock during differentiation of mouse pluripotent stem cells
Source: PubMed Central journal article supplement (PMC5084156; doi:10.1007/s13238-016-0319-9), 2016-09-23
Supplement: 13238_2016_319_MOESM2_ESM.pdf [file 13238_2016_319_MOESM2_ESM.pdf]

**Supplemental Table 1.** The primers used for qPCR in this study.

| Gene name     | Primer (5'-3')                                                  |
|---------------|-----------------------------------------------------------------|
| <i>GAPDH</i>  | Forward :AACGACCCCTTCATTGACCT<br>Reverse: TGGAAGATGGTGATGGGCTT  |
| <i>Oct4</i>   | Forward : CCTTGCAGCTCAGCCTTAAG<br>Reverse: GCGATGTGATGATCTGCTG  |
| <i>Sox2</i>   | Forward :CCAAGATGCACAACCTCGGAT<br>Reverse: CTCCGGGAAGCGTGTACTTA |
| <i>Klf4</i>   | Forward :AGAAGTGTGACAGGGCCTTT<br>Reverse: TCGTGGGAAGACAGTGTGAA  |
| <i>Nanog</i>  | Forward :CGCCATCACACTGACATGAG<br>Reverse: AGAAGAATCAGGGCTGCCTT  |
| <i>Eras</i>   | Forward :CTACTGGAAGGAAGTGGCCA<br>Reverse: TATCTGCTGCAACTGGTCCA  |
| <i>Dax1</i>   | Forward :CTATGTGTGCGGTGAAGAGC<br>Reverse: TGGAAGCAGGGCAAGTACTT  |
| <i>Zfp296</i> | Forward :GTCAACTCCAAACGTCCTCG<br>Reverse: TGGATTCTGAGATGGGGTCG  |
| <i>Esg1</i>   | Forward :GGCAACTGTTATGGCGTGAA<br>Reverse: TCCTGACGAAGCTGTGTCAT  |
| <i>C-Myc</i>  | Forward :CACACAACGTCTTGGAACGT<br>Reverse: CGTCTGCTTGAATGGACAGG  |

|                 |                                                                |
|-----------------|----------------------------------------------------------------|
| <i>PCNA</i>     | Forward :TATGCCGAGACCTTAGCCAC<br>Reverse: GGTTACCGCCTCCTCTTCTT |
| <i>CDK1</i>     | Forward :TCCTGGGCAGTTCATGGATT<br>Reverse: TCCTGGGCAGTTCATGGATT |
| <i>CDK2</i>     | Forward :AATGCAGAGGGGTCCATCAA<br>Reverse: CTCCAGATATCCACGGCTGT |
| <i>CyclinD1</i> | Forward :AGAAGTGCGAAGAGGAGGTC<br>Reverse: CTTAGAGGCCACGAACATGC |
| <i>P27</i>      | Forward :GACCAAATGCCTGACTCGTC<br>Reverse: TCTTCTGTTCTGTTGGCCCT |
| <i>Gata4</i>    | Forward :AAAACGGAAGCCCAAGAACC<br>Reverse: ATAGTGAGATGACAGCCCGG |
| <i>Sox17</i>    | Forward :GCCCTTTGTGTATAAGCCCG<br>Reverse: GCAATAGTAGACCGCTGAGC |
| <i>Foxa2</i>    | Forward :CTACACACACGCCAAACCTC<br>Reverse: TTGAAGGAGAGAGAGTGGCG |
| <i>Lamb1</i>    | Forward :AGCTTGCGTGTGTTTGTGAT<br>Reverse: CAATGTTGTGGTGGCACTGA |
| <i>BMP4</i>     | Forward :CTTCAACCTCAGCAGCATCC<br>Reverse: GATGAGGTGTCCAGGAACCA |
| <i>T</i>        | Forward :ACCCAGCTCTAAGGAACCAC<br>Reverse: GCTGGCGTTATGACTCACAG |

|                          |                                                                |
|--------------------------|----------------------------------------------------------------|
| <i>Eomes</i>             | Forward :TCGTGGAAGTGACAGAGGAC<br>Reverse: TAGTTGTCCCGGAAGCCTTT |
| <i>Actc1</i>             | Forward :TGCCGATCGTATGCAAAAGG<br>Reverse: GGCCTGCCTCATCATACTCT |
| <i>Nestin</i>            | Forward :AGGTGTCAAGGTCCAGGATG<br>Reverse: AAGGAAGCAGACTCAGACCC |
| <i>Neurod1</i>           | Forward :AGGAGGAGGATCAAAAGCCC<br>Reverse: GGGTCTTGGAGTAGCAAGGT |
| <i>Sox1</i>              | Forward :ACACAGTGGGGATAACAGCA<br>Reverse: GCCACGCCCTCATGATATTG |
| <i>Otx1</i>              | Forward :CGGAAGCTATGGTCAGGGAT<br>Reverse: TGAAGATTGGCTCAGTGGGT |
| <i>Bcl-2</i>             | Forward :AACTCTTCAGGGATGGGGTG<br>Reverse: TACTCAGTCATCCACAGGGC |
| <i>Bax</i>               | Forward :GAGACACCTGAGCTGACCTT<br>Reverse: GTCCACGTCAGCAATCATCC |
| <i>cleaved caspase-3</i> | Forward :CAGCCAACCTCAGAGAGACA<br>Reverse: ACAGGCCCATTTGTCCCATA |
| cleaved caspase-9        | Forward: CCAAGATGCACAACTCGGAG<br>Reverse: ATCCGGGTGTTCTTCATGT  |
| <i>Bmal1</i>             | Forward: AGGCCACAGTCAGATTGAA<br>Reverse: GAACAGCCATCCTTAGCACG  |

|              |                                                                |
|--------------|----------------------------------------------------------------|
| <i>Clock</i> | Forward: ATGCCACAGAACAGTACCCA<br>Reverse: TTGTGTGGCGAAGGTAGGAT |
| <i>Cry1</i>  | Forward: GGCAACTGTTATGGCGTGAA<br>Reverse: TCCTGACGAAGCTGTGTCAT |
| <i>Cry2</i>  | Forward: TTCTACACGGCAGCTACCAA<br>Reverse: TGCCTCAGTTGGGTCATGAT |
| <i>Per1</i>  | Forward: CACCCTGATGACCCACTCTT<br>Reverse: CCTCCTCCTCCATAGCCAAG |
| <i>Per2</i>  | Forward: AGCGTTACCTCTGAGCACAT<br>Reverse: ATGGATGCAACCTGGTCAGA |
| <i>Per3</i>  | Forward: CCCTGTCTGTCCTCTGTTGT<br>Reverse: CTCTCTCCTTTGGCTGGTGA |

**Supplemental Table2.** The clones used for detecting mutations in this study.

|                                                |           |
|------------------------------------------------|-----------|
| Total clones (number)                          | 31        |
| The sequences of bases have changed in clones  | 8 (25.8%) |
| CLOCK protein expression has changed in clones | 6 (19.4%) |
| Homozygous clones                              | 3 (9.68%) |
| Heterozygous clones                            | 3 (9.68%) |

We totally picked out 31 single mESC clones, and 8 (25.8%) of them (clone 5, clone 13,

clone 17, clone 19, clone 20, clone 23, clone 24, and clone 28) showed sequence modifications at the CRISPR/CAS9 cutting site. CLOCK protein expression has changed in 6 clones (19.4%) (clone 17, clone 19, clone 20, clone 23, clone 24, and clone 28) of the 8 positive clones with Western blotting. The results indicated that CLOCK protein expression was totally ablated in three clones (9.68%) (clone 17, clone 19, and clone 20), for homozygous clones; CLOCK protein expression was not totally ablated in three clones (9.68%) (clone 23, clone 24, and clone 28), for heterozygous clones.

**Supplemental Table 3.** The most probable ten off-target modification sites and the primers used for detecting off-target effects in this study.

| Position  | Sequence                    | Score   | Off-target | Gene      | Primer                        |
|-----------|-----------------------------|---------|------------|-----------|-------------------------------|
| 76694865  | TCCATCTTTCTC<br>GCGTTACCAGG | 100     | True       | NM_007715 |                               |
| 125121193 | TCTATTGTTCCA                | 0.75166 | False      | NM_146171 | Fwd: TCTGGCTATCCGCTTCCCTAA    |
|           | CAGTACGCCAG                 | 9231    |            |           | Rev: CGCTGTCTTCCGCACTTGTT     |
| 102221420 | TCAAGGCAACTC                | 0.52628 | False      | NM_011403 | Fwd: CTTCCCACAGAGCAAACAGC     |
|           | GAGAAAGAGAG                 | 9801    |            |           | Rev: CCAGCCAAGCCTGAAAGC       |
| 99910981  | TCCCTGTAAAGC                | 0.50994 | False      | NM_010659 | Fwd: AGGACCAAGTGAGTTATTCAGCAT |
|           | AAGAAAGATGG                 | 8268    |            |           | Rev: GTTCCTCTTGAGACACAGCAGC   |
| 172444809 | GCTTCTTTTCTA                | 0.48547 | False      | NM_027528 | Fwd: GAGCAAGATGAAAATGGAAGCA   |
|           | CAGTACGTGGG                 | 3295    |            |           | Rev: AAAGCCATCCATTCTGCCTCT    |

|               |              |         |       |            |                               |
|---------------|--------------|---------|-------|------------|-------------------------------|
| 5179756       | TCCTGGTCCTGG | 0.36666 | False | NM_0010809 | Fwd: TTATCACACAGAGCCAAATCACC  |
|               | GAGAAAGAGGG  | 4223    |       | 24         | Rev: GGTTGAGGAGGGCTCTCTTTAT   |
| 66796510      | CAAAGGTAGAGA | 0.33961 | False | NM_0011623 | Fwd: TAGAGAGATGGTGGCGTTTGT    |
|               | GAGCCCAAGAG  | 9976    |       | 66         | Rev: TGACCCTCGCTGCTATCCC      |
| 13625204<br>5 | AAAAAGTAGAAA | 0.25987 | False | NM_0010424 | Fwd: GGCTGCTGCTGGCTTCCTA      |
|               | GAGCCCAGGGG  | 7595    |       | 85         | Rev: CAGCCATAGGAAAGACAATCACC  |
| 90993123      | TCCTAGTAAAGA | 0.24692 | False | NM_211138  | Fwd: GACATTTTGGGTAAAGGGAAGG   |
|               | CAGAAAGACAG  | 7836    |       |            | Rev: TTCAGGTGAGCAGGGAGGTAGT   |
| 90964219      | CCCTGGAAACAC | 0.23525 | False | NM_0010455 | Fwd: TTAGAGCAGTCCTTAGAGACACCA |
|               | GAGACAGACAG  | 4       |       | 15         | Rev: CCCAGTTTTGTTGTCTTATGAGC  |
| 79182745      | GAGAGGTAGAGA | 0.22815 | False | NM_0010481 | Fwd: GACATCAGCATCAGAACCCTAAT  |
|               | GAACGCAAGGG  | 1896    |       | 76         | Rev: CACTGACCGTATGTGACCTGTAA  |
